# Supplementary material
Source: PubMed Central journal article supplement (PMC2427360)

**Supplementary Figure 1.** Deamination spectra and "difference spectra" of WT AID, S41A and S43A phosphorylation mutant AID

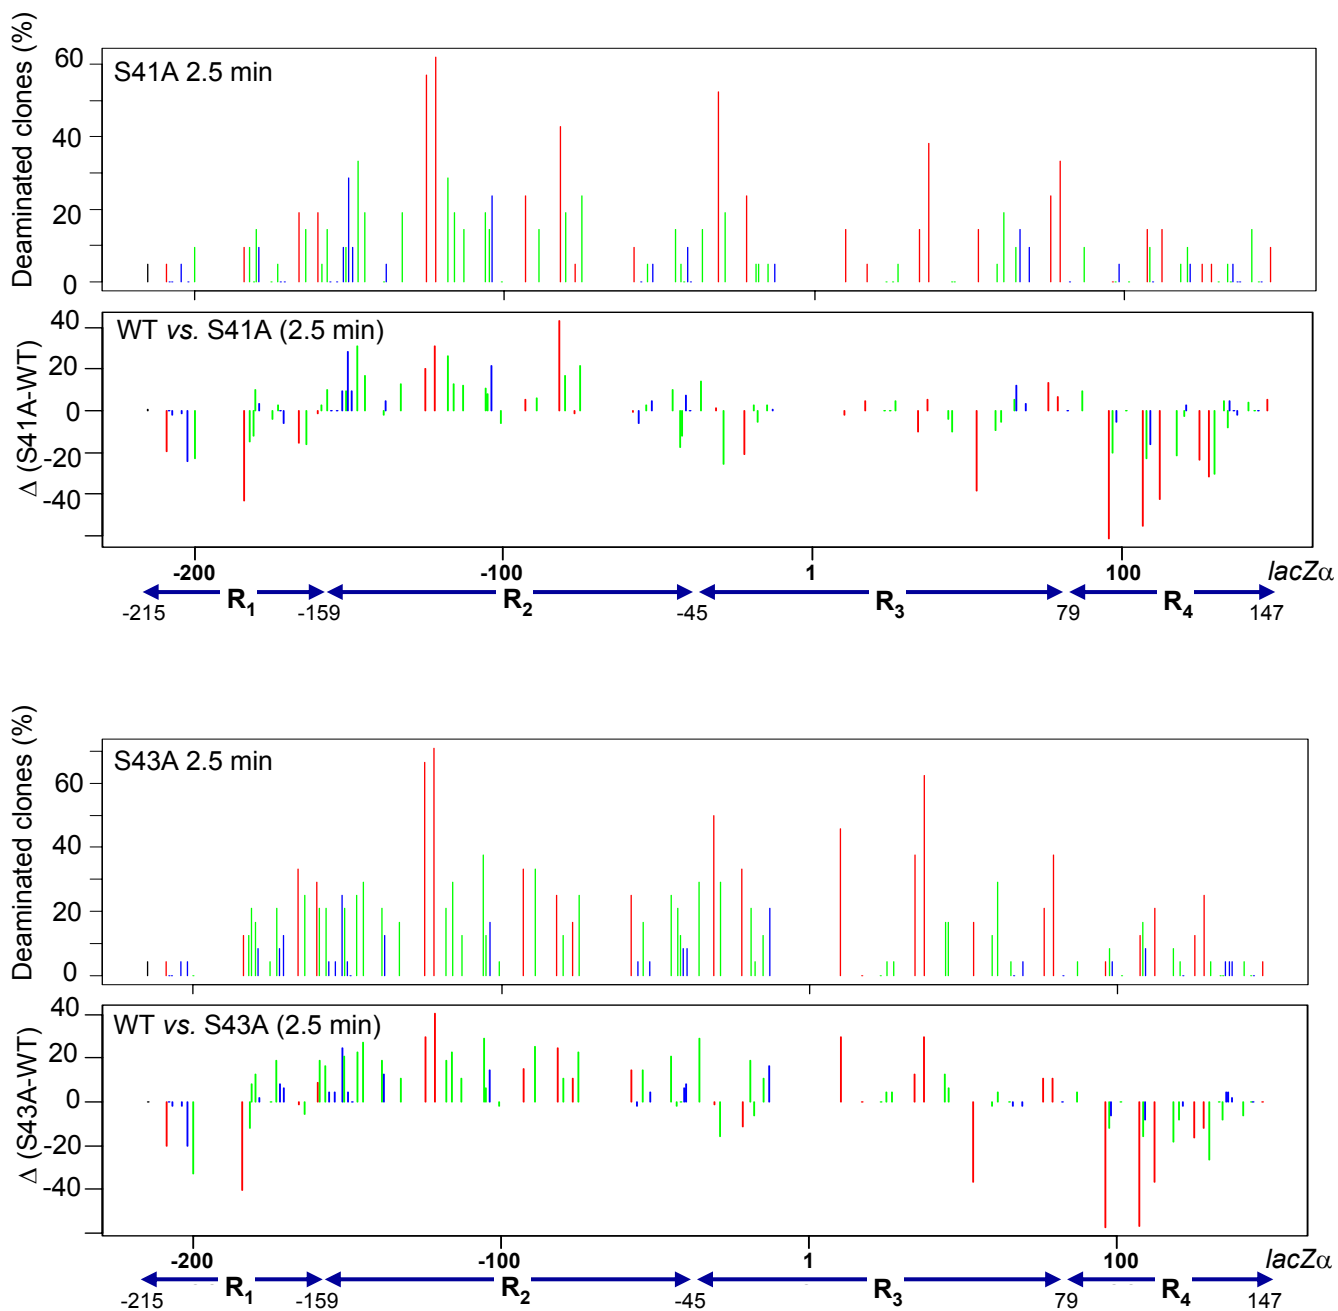

**Supplementary Figure 2.** The distribution of M13 mutant clones containing C→T mutations in the lacZa reporter sequence (see sketch, Fig. 3a) initiated by WT-AID and S38A AID catalyzed deaminations, following 2.5 min and 10 min incubations

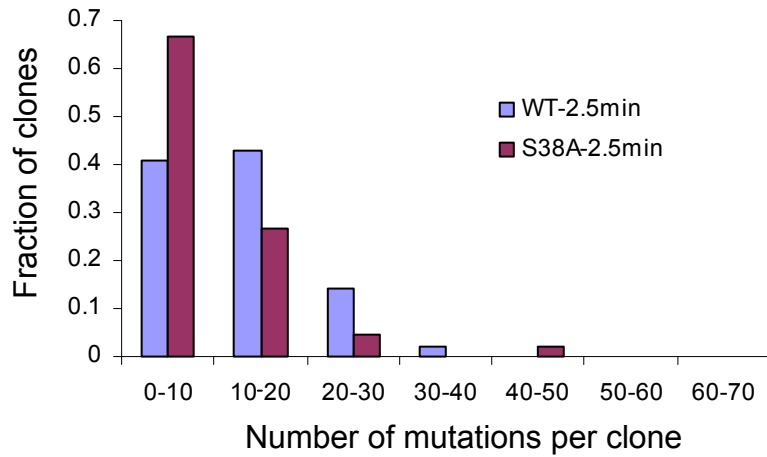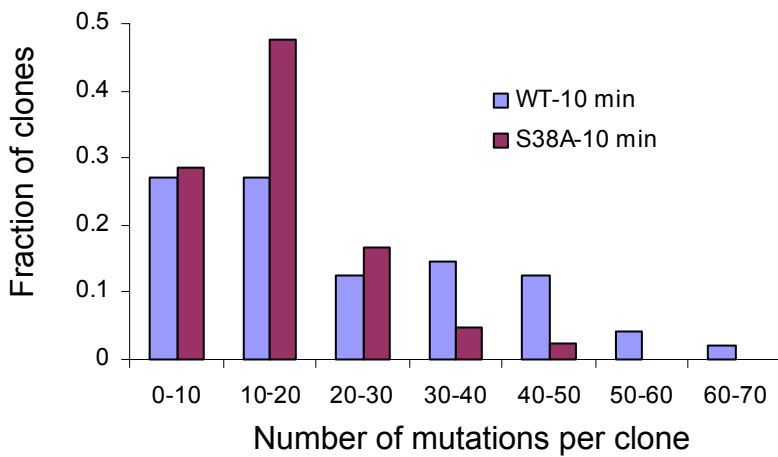

Supplement: M802121200_1.pdf [file M802121200_1.pdf]
